# Supplementary material
Source: PubMed Central journal article supplement (PMC534418)
Supplement: pnas_101_49_17033__1.pdf [file pnas_101_49_17033__1.pdf]

1. □<sub>1</sub>□AGP

2. □<sub>1</sub>□AGPA

3. □<sub>1</sub>□AGPB

4. Ceruloplasmine

5. Fibrinogen

6. Transferrin

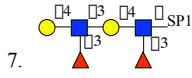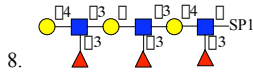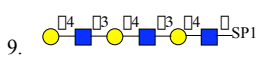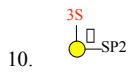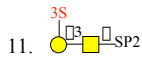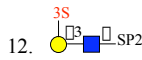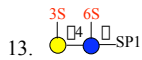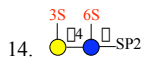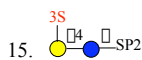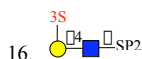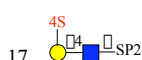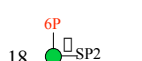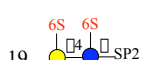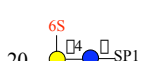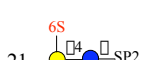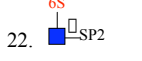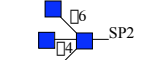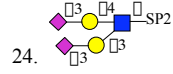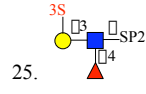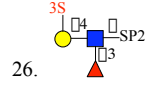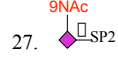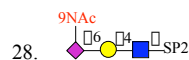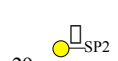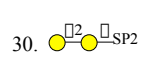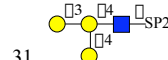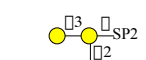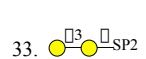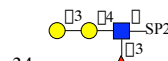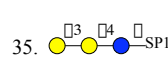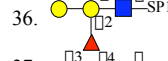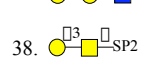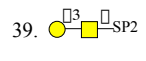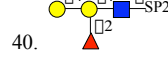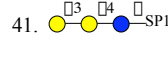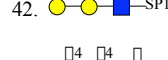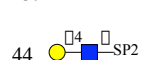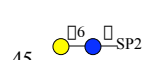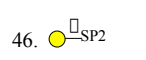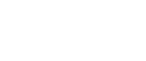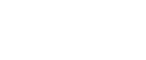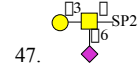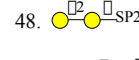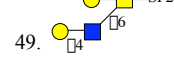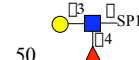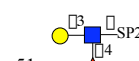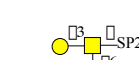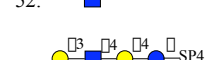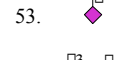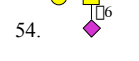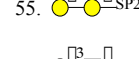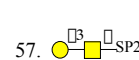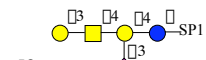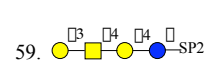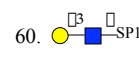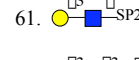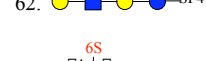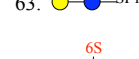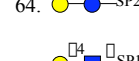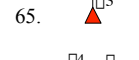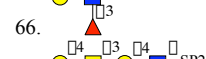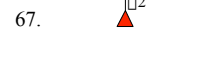

68. 69. 70. 71. 72. 73. 74. 75. 76. 77. 78. 79. 80. 81. 82. 83. 84. 85. 86. 87. 88. 89. 90. 91. 92. 93. 94. 95. 96. 97. 98. 99. 100. 101. 102. 103. 104. 105. 106. 107. 108. 109. 110. 111. 112. 113. 114. 115. 116. 117. 118. 119. 120. 121. 122. 123. 124. 125. 126. 127. 128. 129. 130. 131. 132. 133. 134. 135. 136. 137. 138. 139. 140. 141. Man5 – Man9

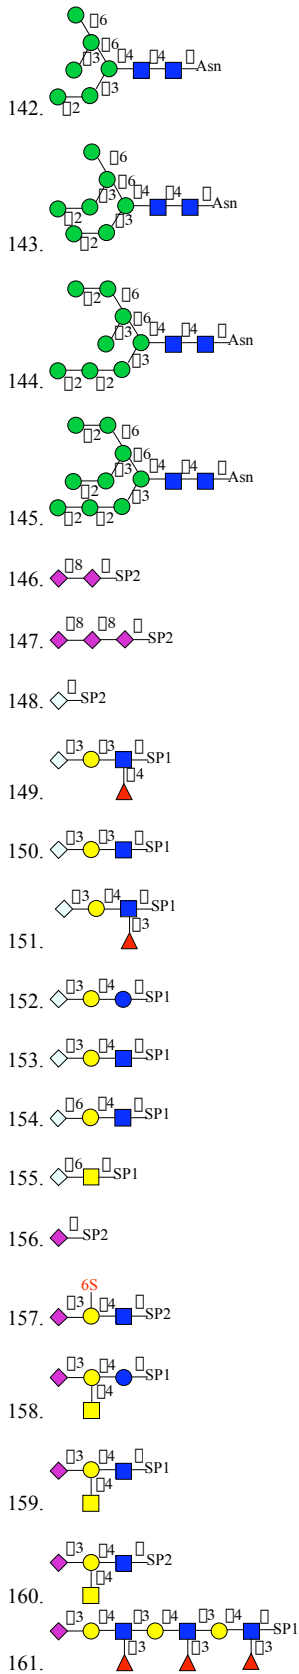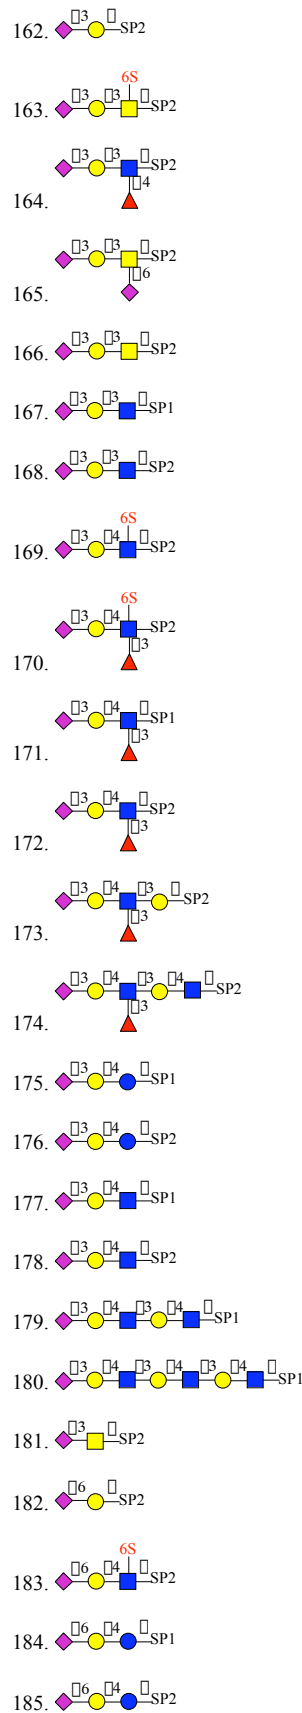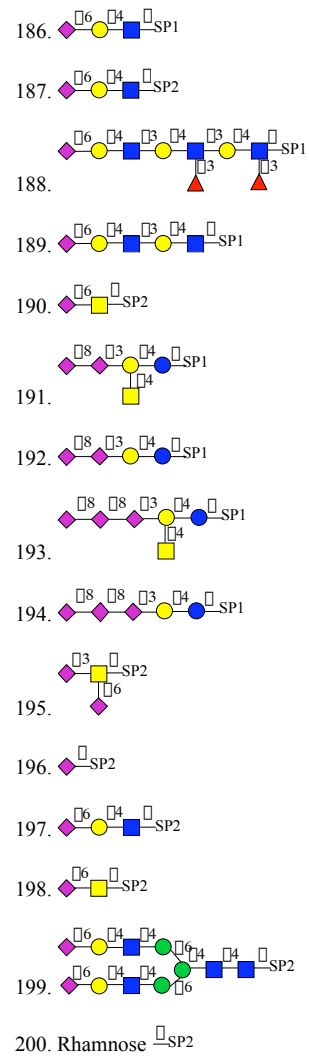

|  |          |                                             |
|--|----------|---------------------------------------------|
|  | = Glc    | SP1 = -(CH <sub>2</sub> ) <sub>2</sub> -NH- |
|  | = Gal    | SP2 = -(CH <sub>2</sub> ) <sub>3</sub> -NH- |
|  | = GlcNAc | SP3 = -(CH <sub>2</sub> ) <sub>5</sub> -NH- |
|  | = GalNAc | SP4 = -NH-C(O)-CH <sub>2</sub> -NH-         |
|  | = Neu5Ac | SP5 = -(CH <sub>2</sub> ) <sub>4</sub> -NH- |
|  | = Fuc    | S = SO <sub>3</sub>                         |
|  | = KDN    |                                             |
|  | = Man    |                                             |
|  | = GlcA   |                                             |
|  | = Neu5Gc |                                             |
